# Supplementary material for: Targeted Long-Read Bisulfite Sequencing Identifies Differences in the TERT Promoter Methylation Profiles between TERT Wild-Type and TERT Mutant Cancer Cells
Source: MDPI journal article supplement (doi:10.3390/cancers14164018), 2022-08-19
Supplement: s1 [file s1]

## Supplemental Figure 3

(A)

1,295,224 **Core** **Proximal** 1,295,546  
*TERT* promoter

(B)

## Mutant cancer cell lines

A375

UMUC3

GGGACGGGG  
↓  
GGGATGGGG

TCGGGACGGGGCGGGG  
↓ ↓ ↓  
TTGGGATGGGGTGGGG

*TERT* promoter  
(bisulfite conversion)  
No methylation

GGG**A**NGGGG

TN**GGG**ANGGGGGN**GGGG**

ChIP:

Input

GGG**A**TGGGG

TTGGGANGGGGTGGGG

H3K4me2/3

GGG**A**NGGGG

TCGGGANGGGGCGGGG

H3K27me3

(C)

## Wild-type cancer cell lines

253J

NCI-H358

AGGGGTCTGGG  
↓  
AGGGGTTGGG

CTCCGCCACGTG  
↓ ↓  
TTTTGTTATGTG

*TERT* promoter  
(bisulfite conversion)  
No methylation

AGGGGGTTCGGG

ChIP:

Input

AGGGGTNGGG

TTTCGTTATGTG

H3K4me2/3

H3K27me3
