# Supplementary material for: Targeted Long-Read Bisulfite Sequencing Identifies Differences in the TERT Promoter Methylation Profiles between TERT Wild-Type and TERT Mutant Cancer Cells
Source: MDPI journal article supplement (doi:10.3390/cancers14164018), 2022-08-19
Supplement: s1 [file s1]

Supplemental Figure 4

(A) Epiallele 1

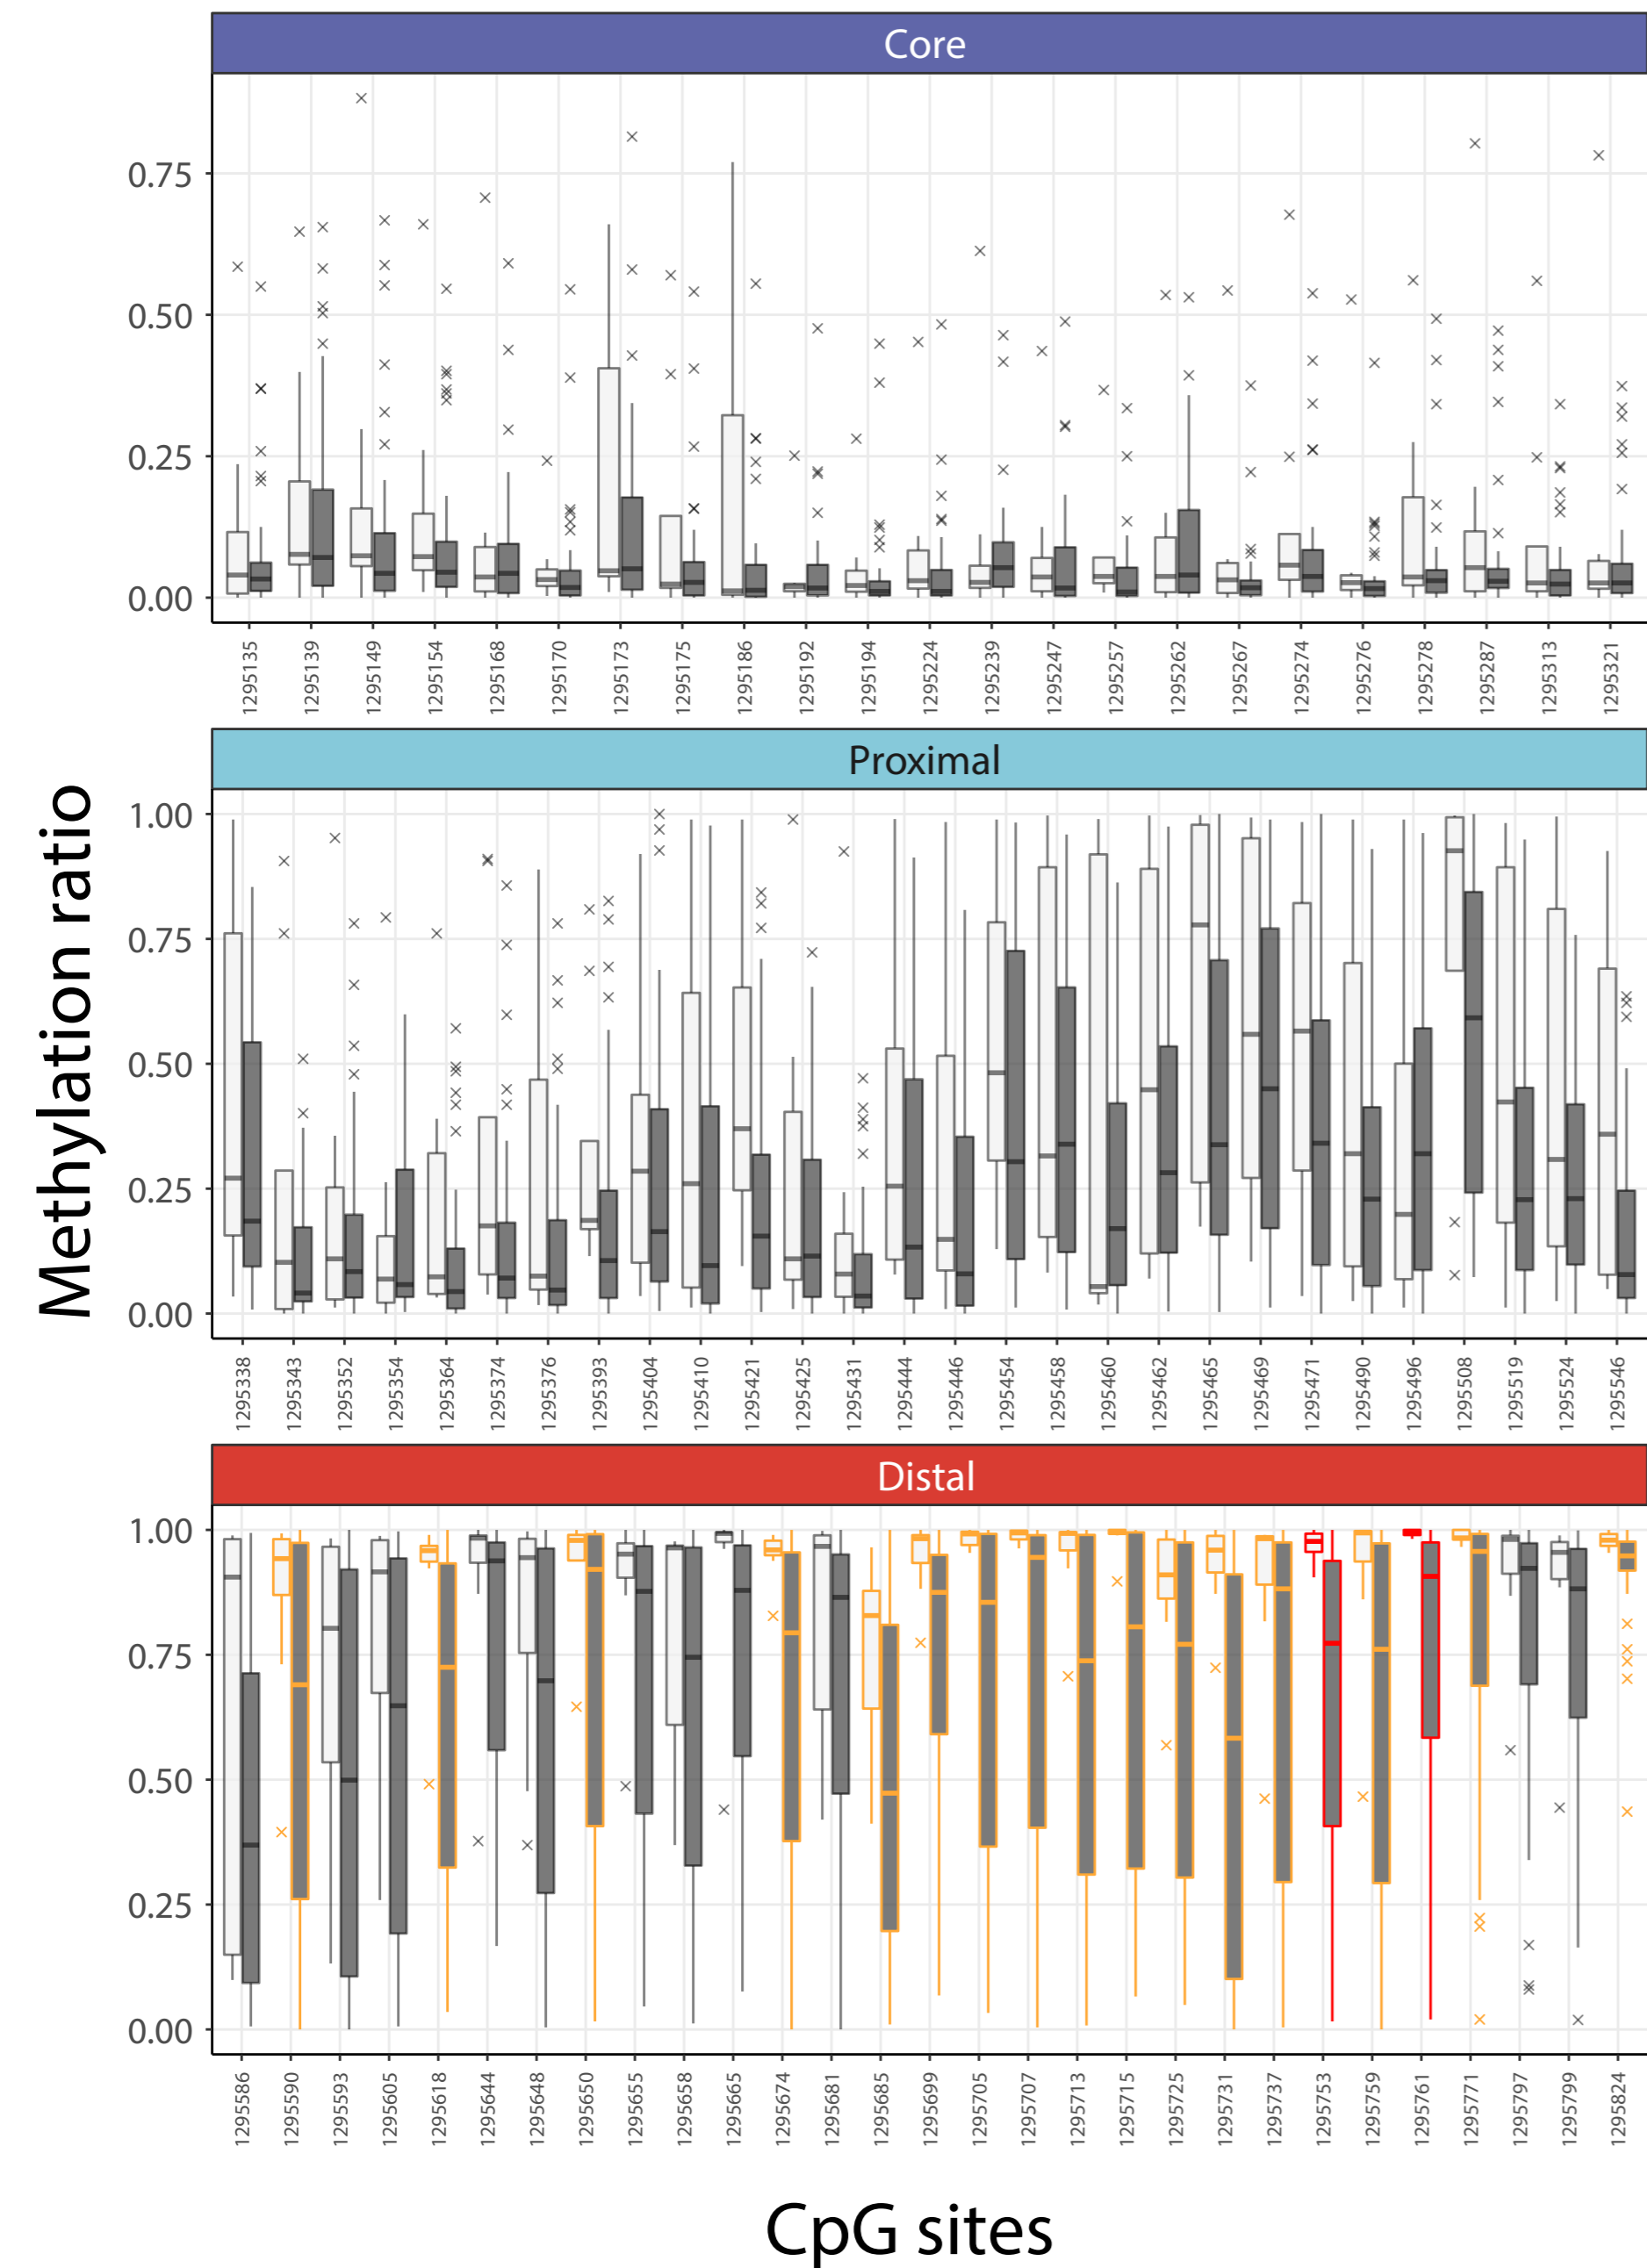

(B) Epiallele 2

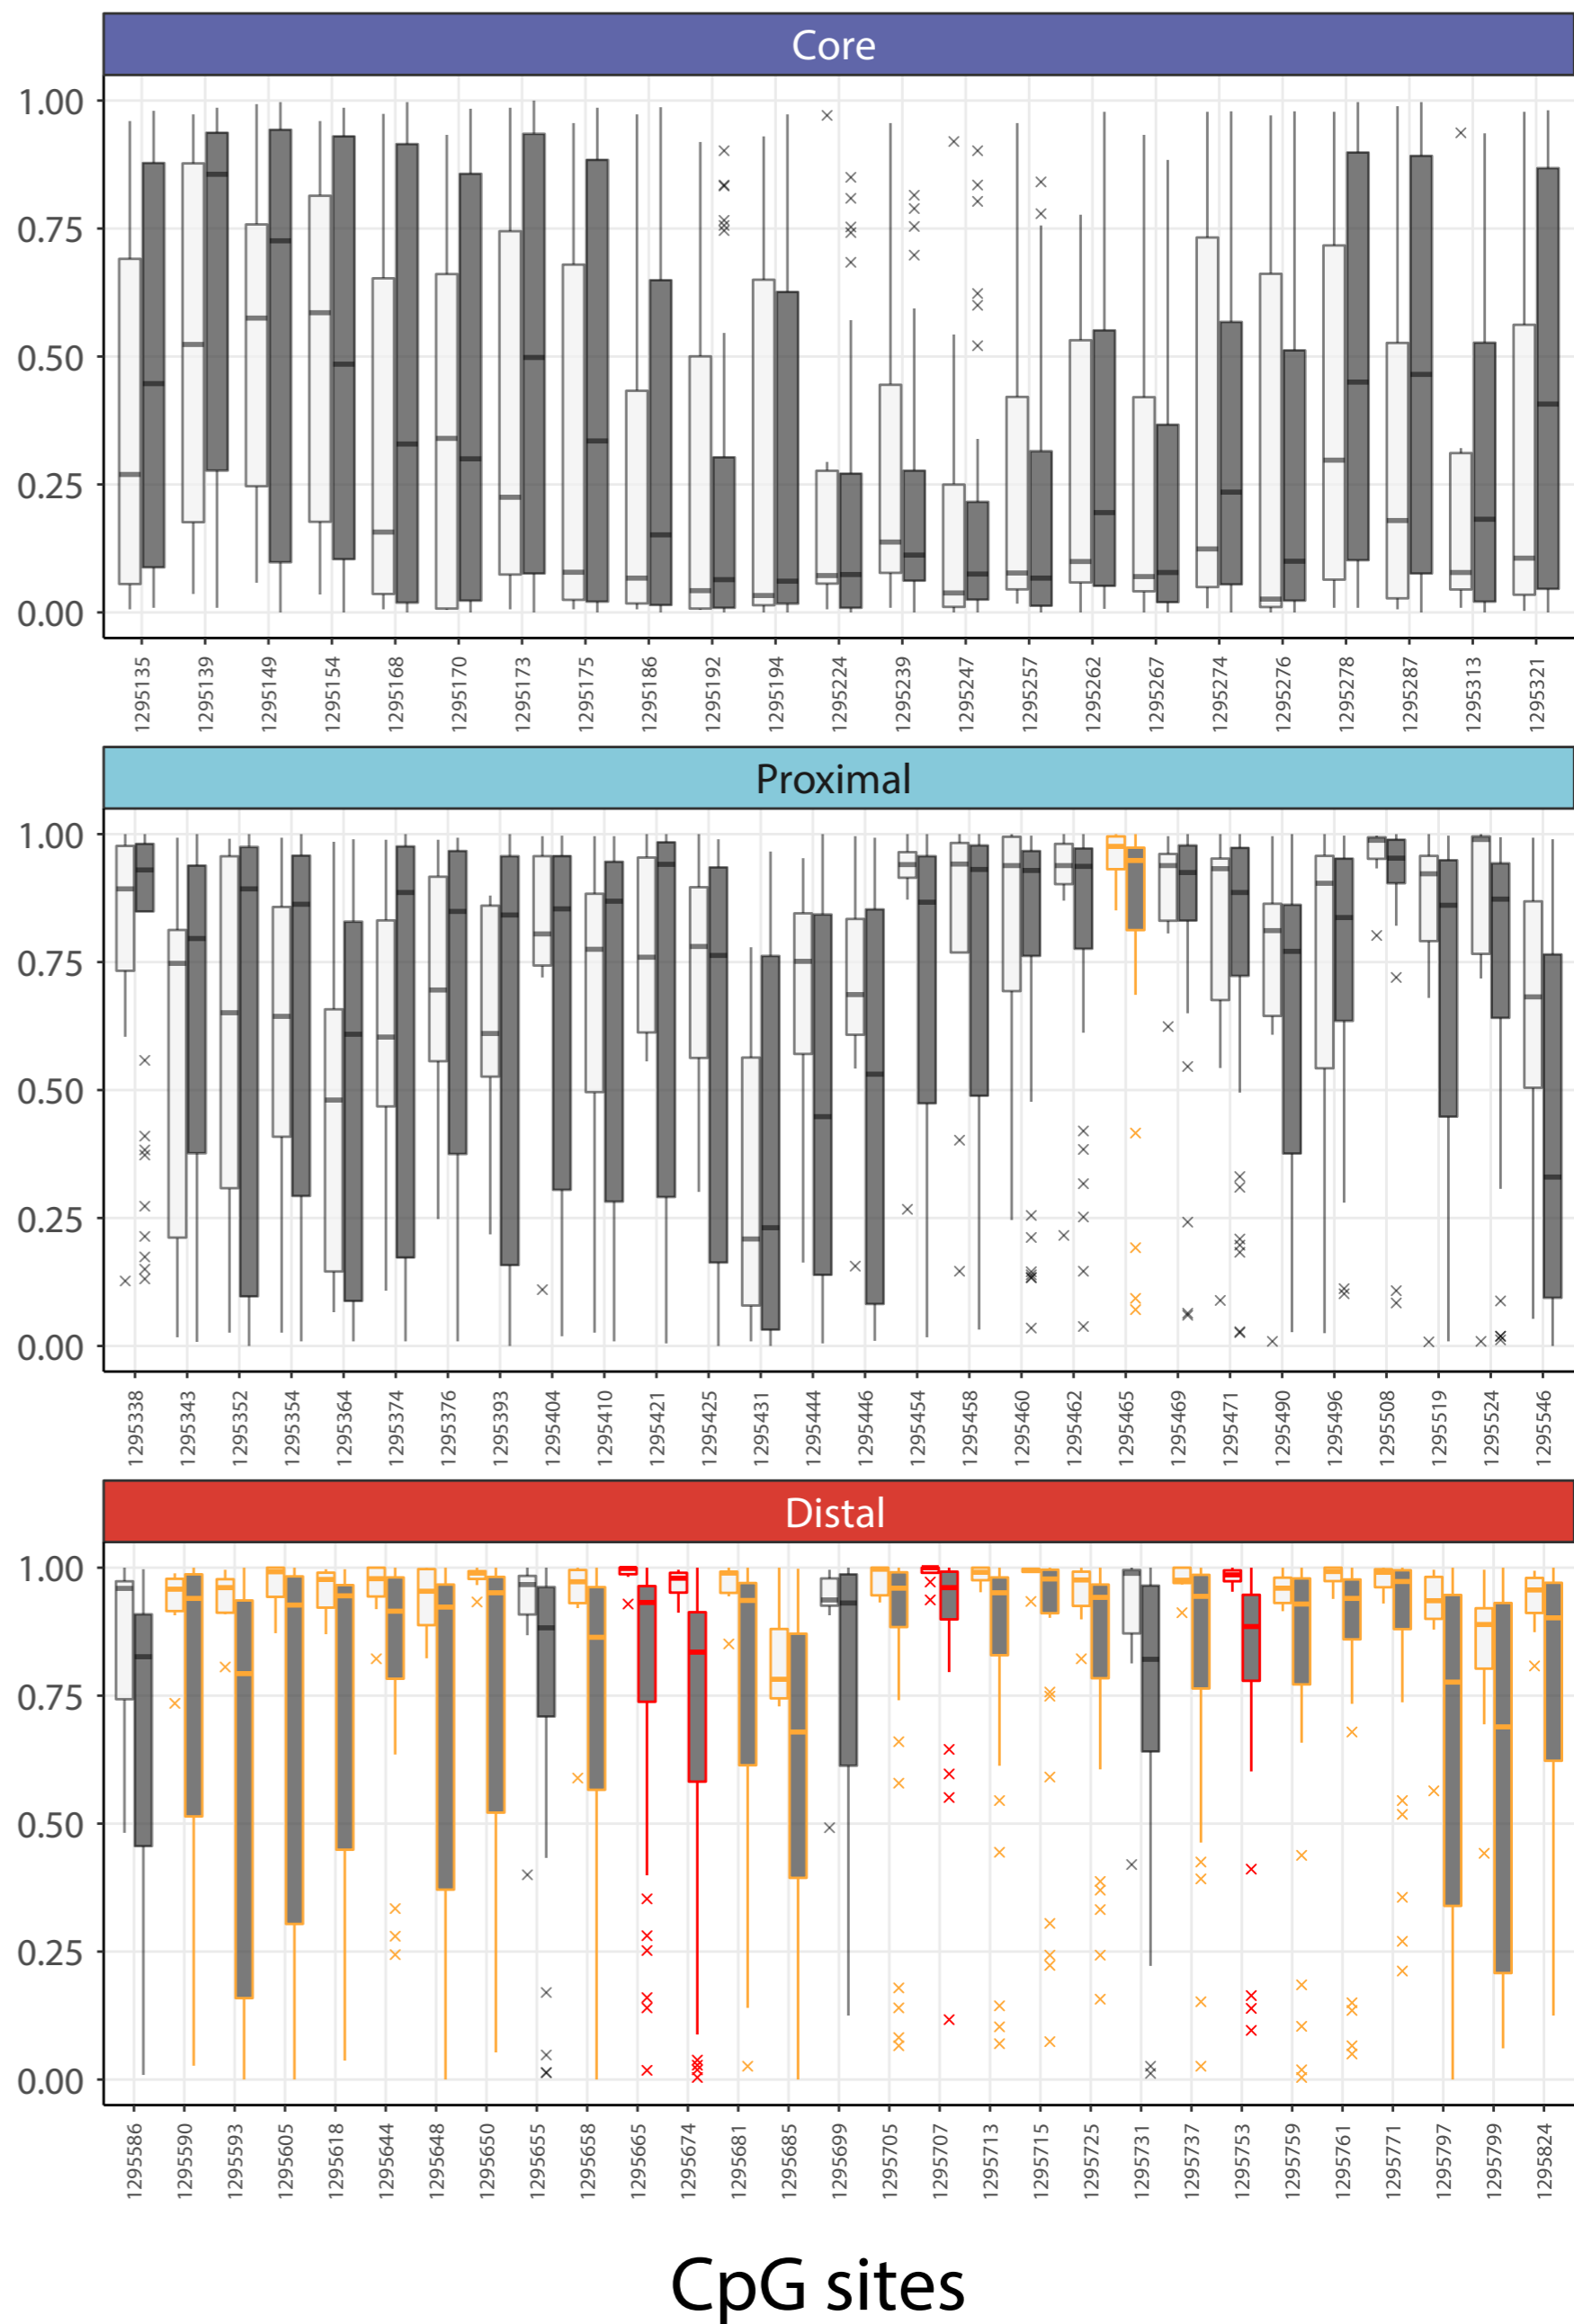

Cell lines:

Wild-type  
Mutant

Statistical test:

p-value > 0.05  
t-test and wilcoxon rank sum test adjusted p-value < 0.05  
t-test adjusted p-value < 0.05
