# Supplementary figures and images for: Targeted Long-Read Bisulfite Sequencing Identifies Differences in the TERT Promoter Methylation Profiles between TERT Wild-Type and TERT Mutant Cancer Cells
Source: MDPI journal article supplement (doi:10.3390/cancers14164018), 2022-08-19

Supplemental Figure 2

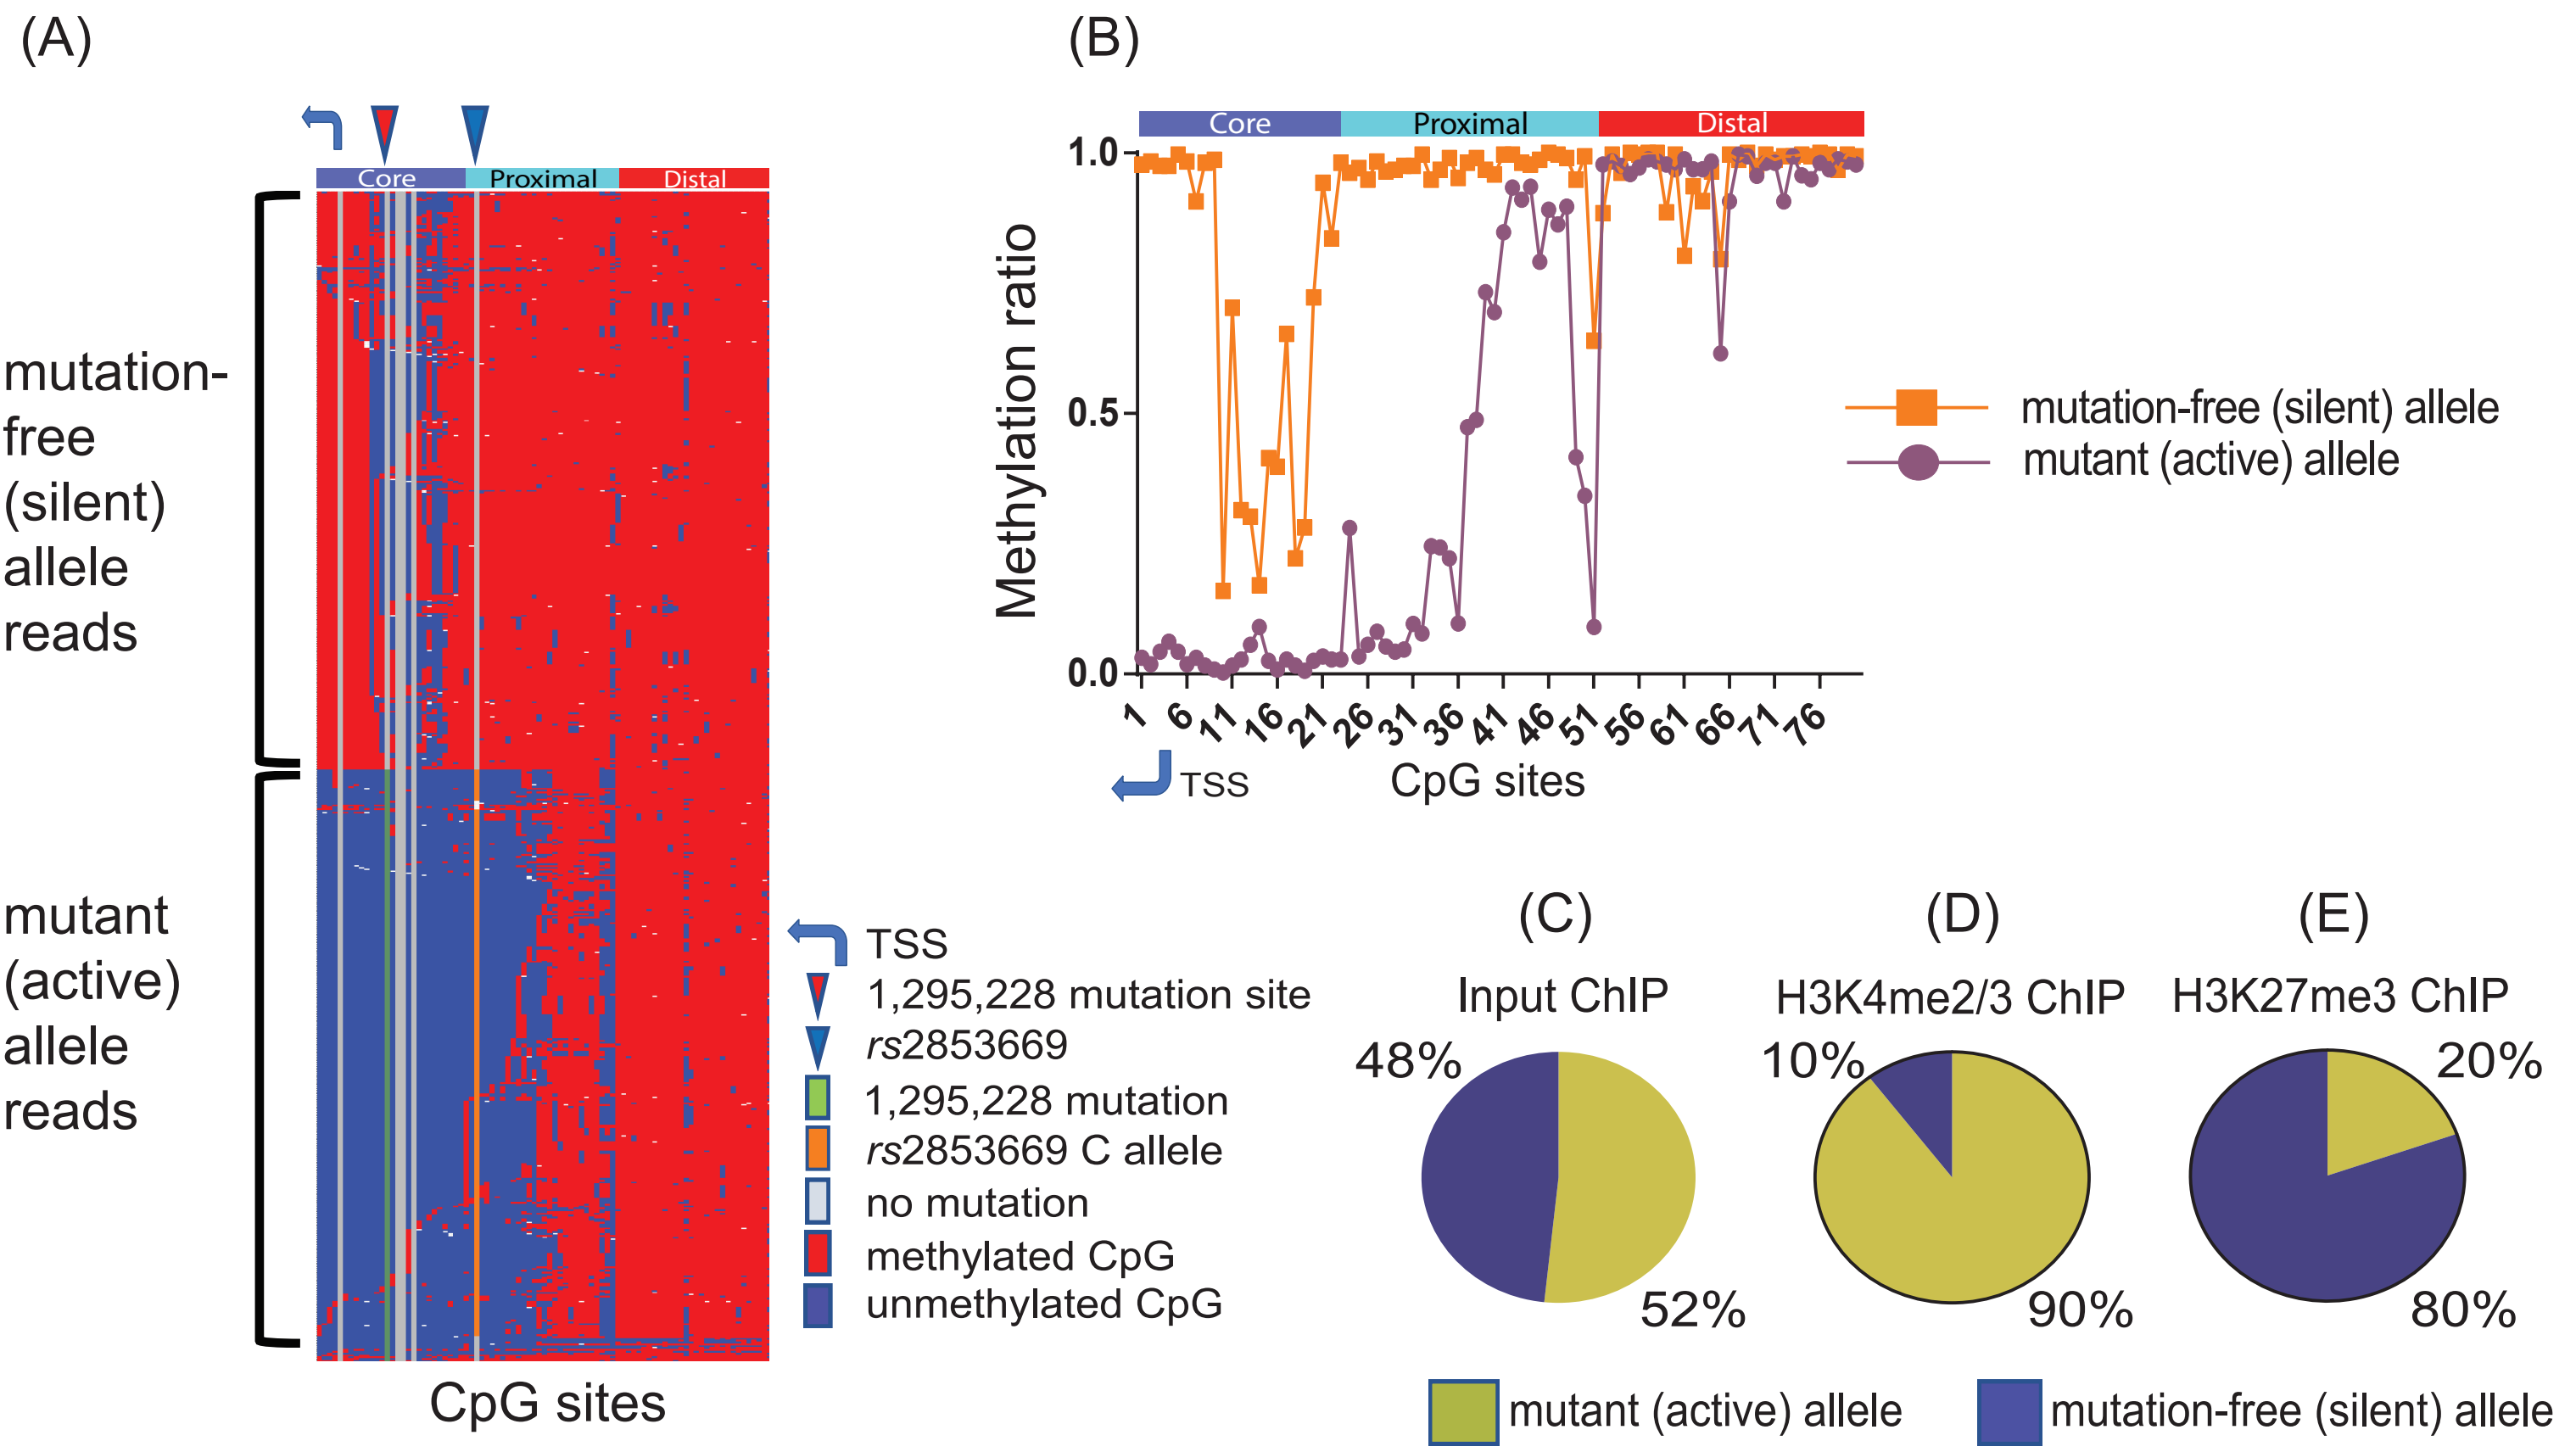

Supplement: s1 [file s1]

Supplemental Figure 1

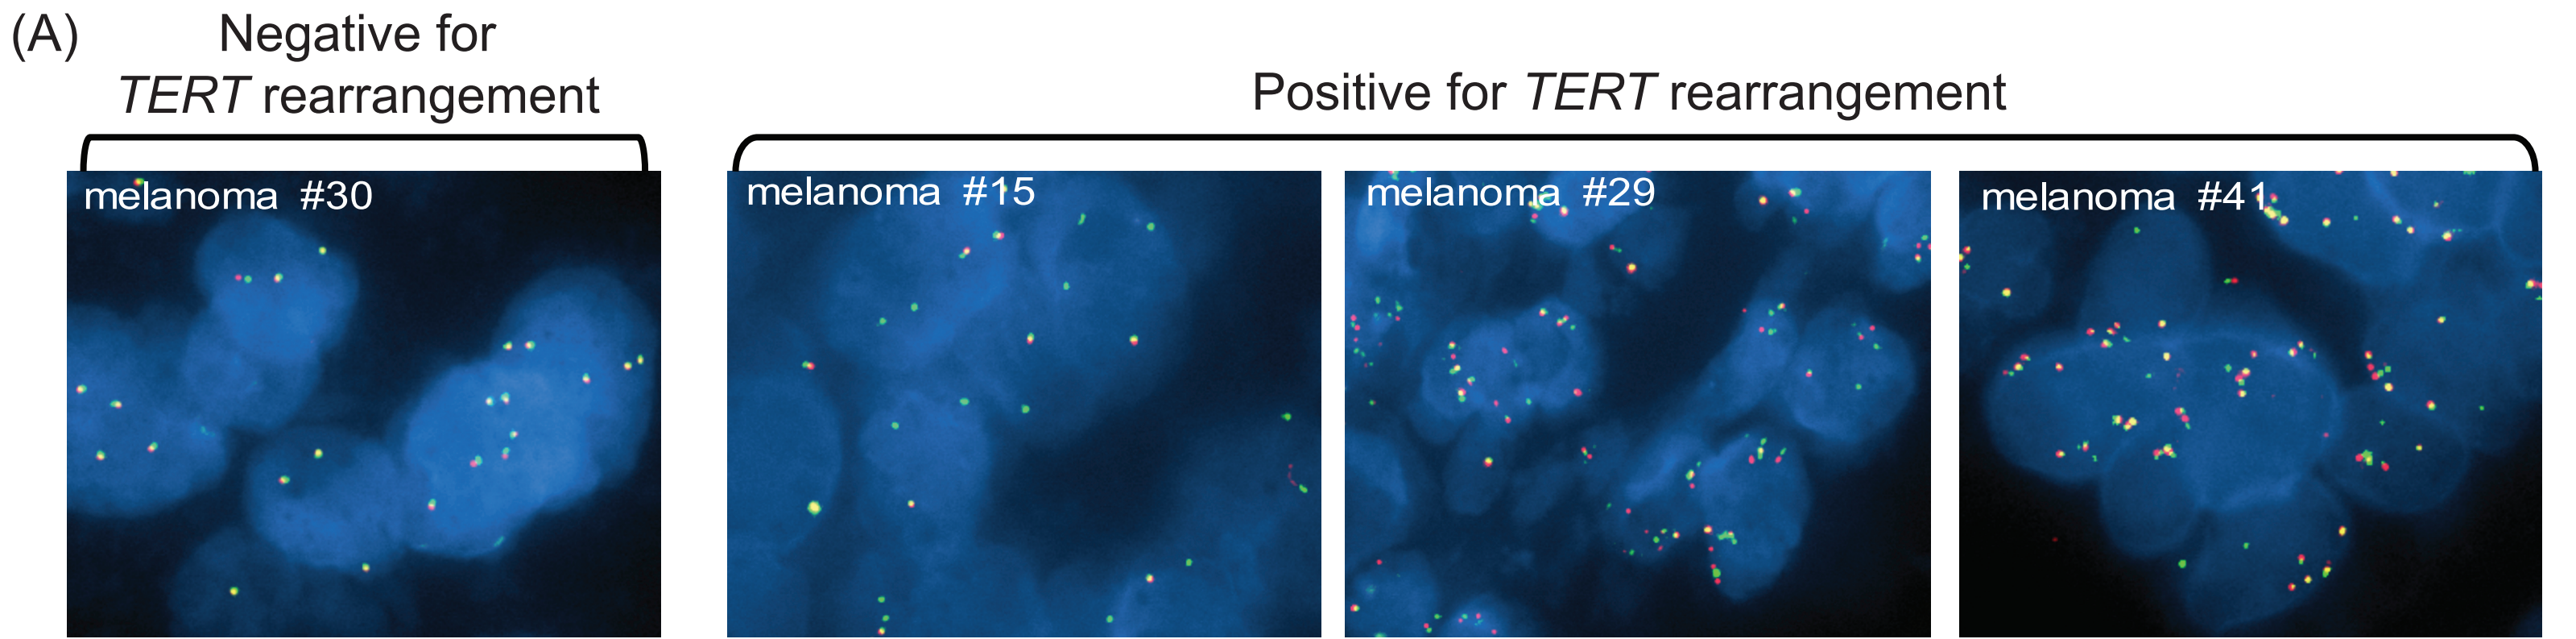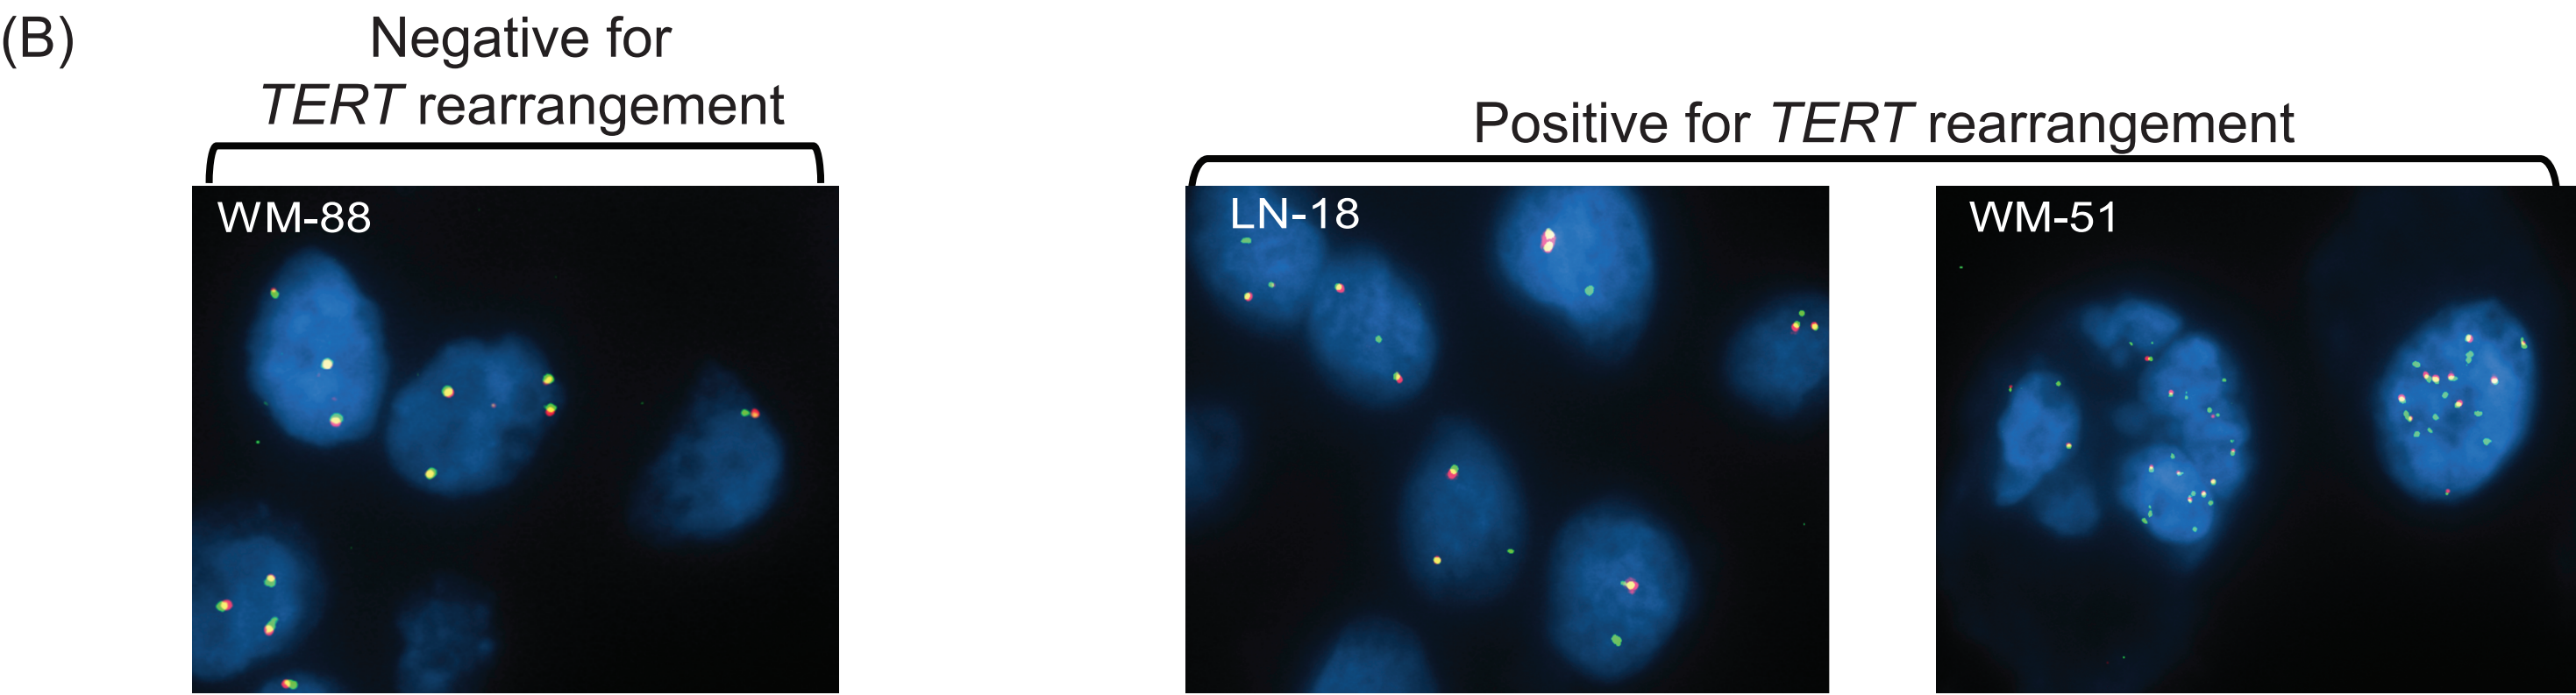

*TERT* break-apart probes 5'  3'

Supplement: s1 [file s1]

Supplemental Figure 6

(A)

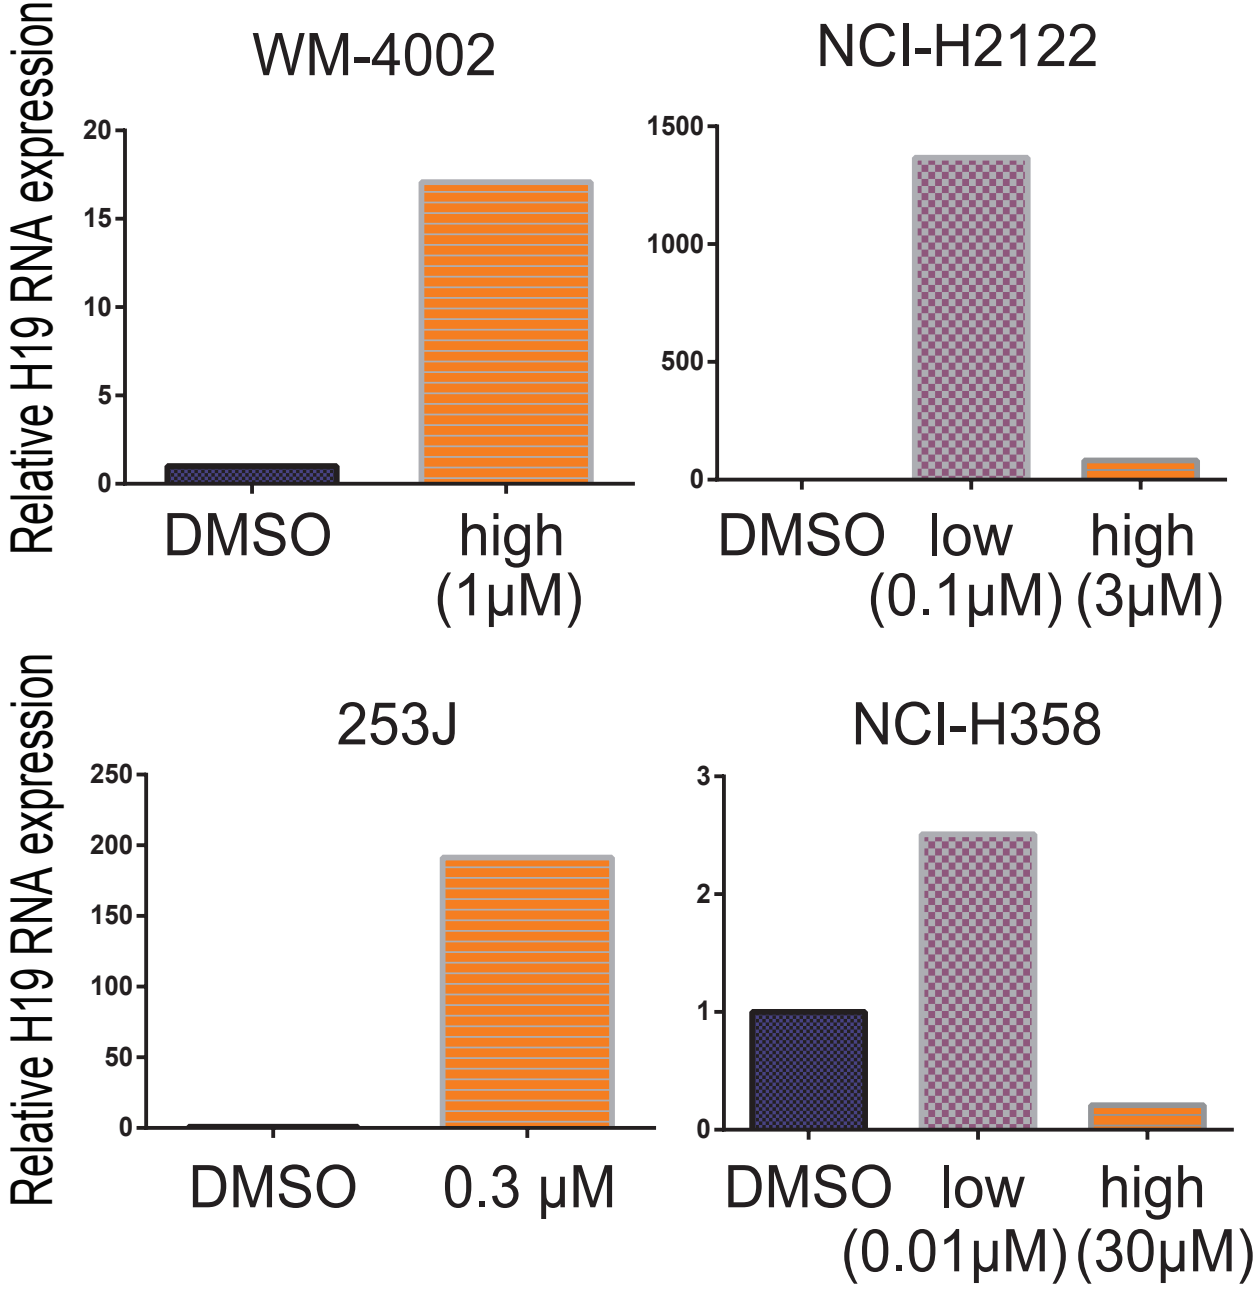

(B)

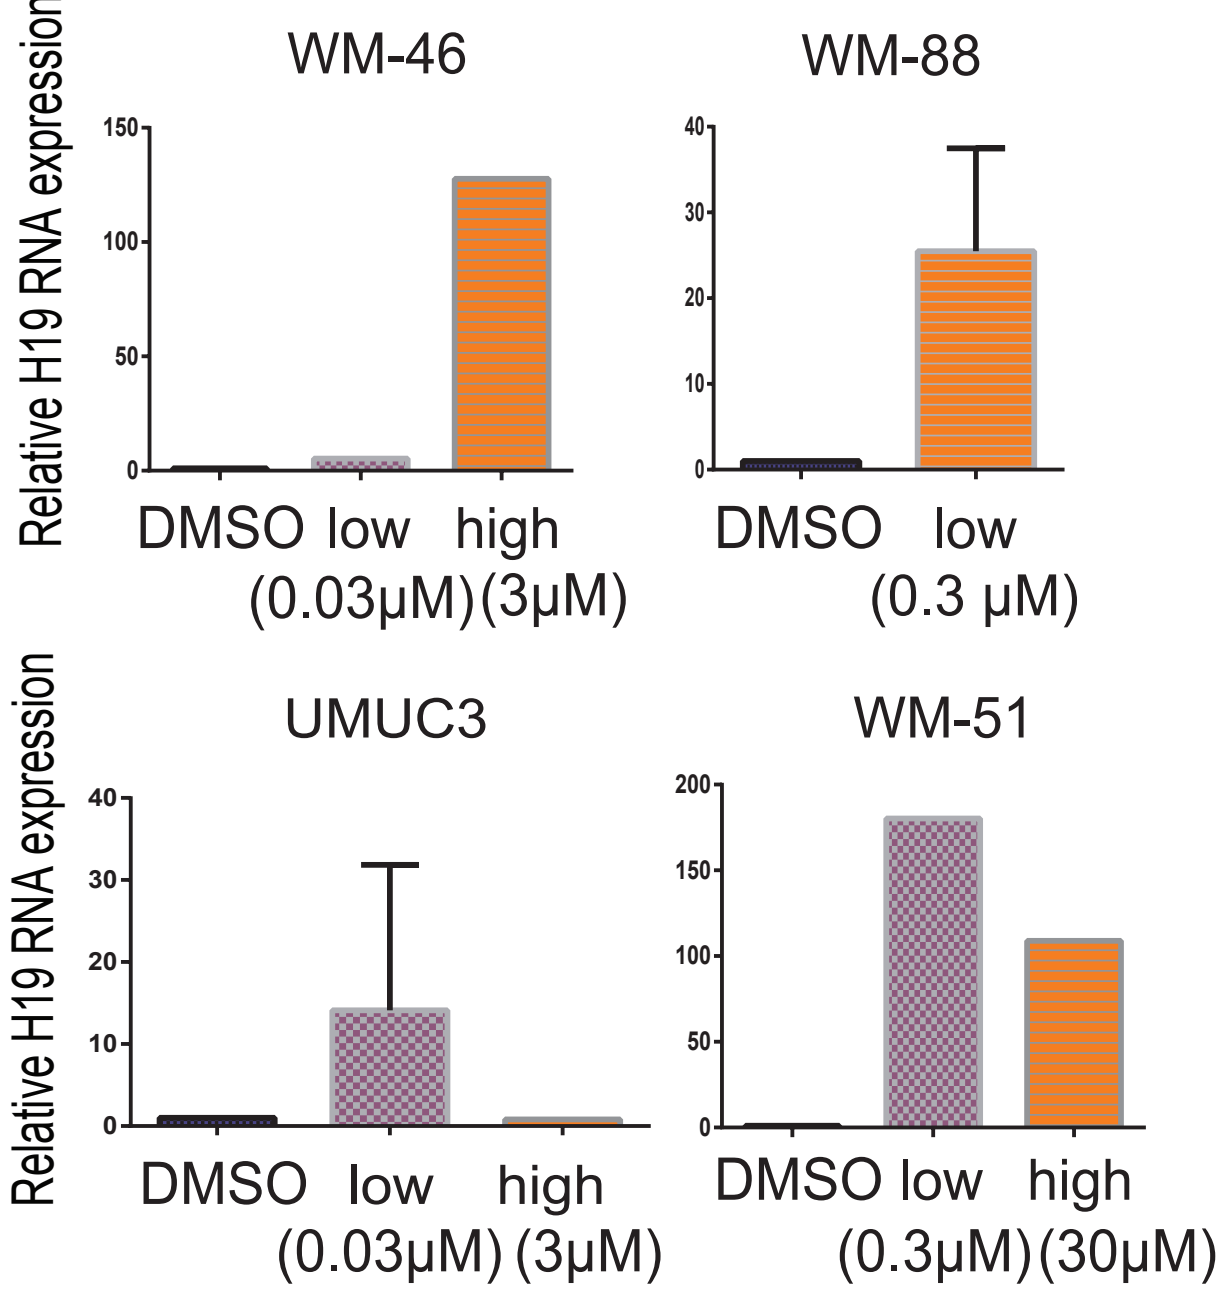

Supplement: s1 [file s1]

Supplemental Figure 5

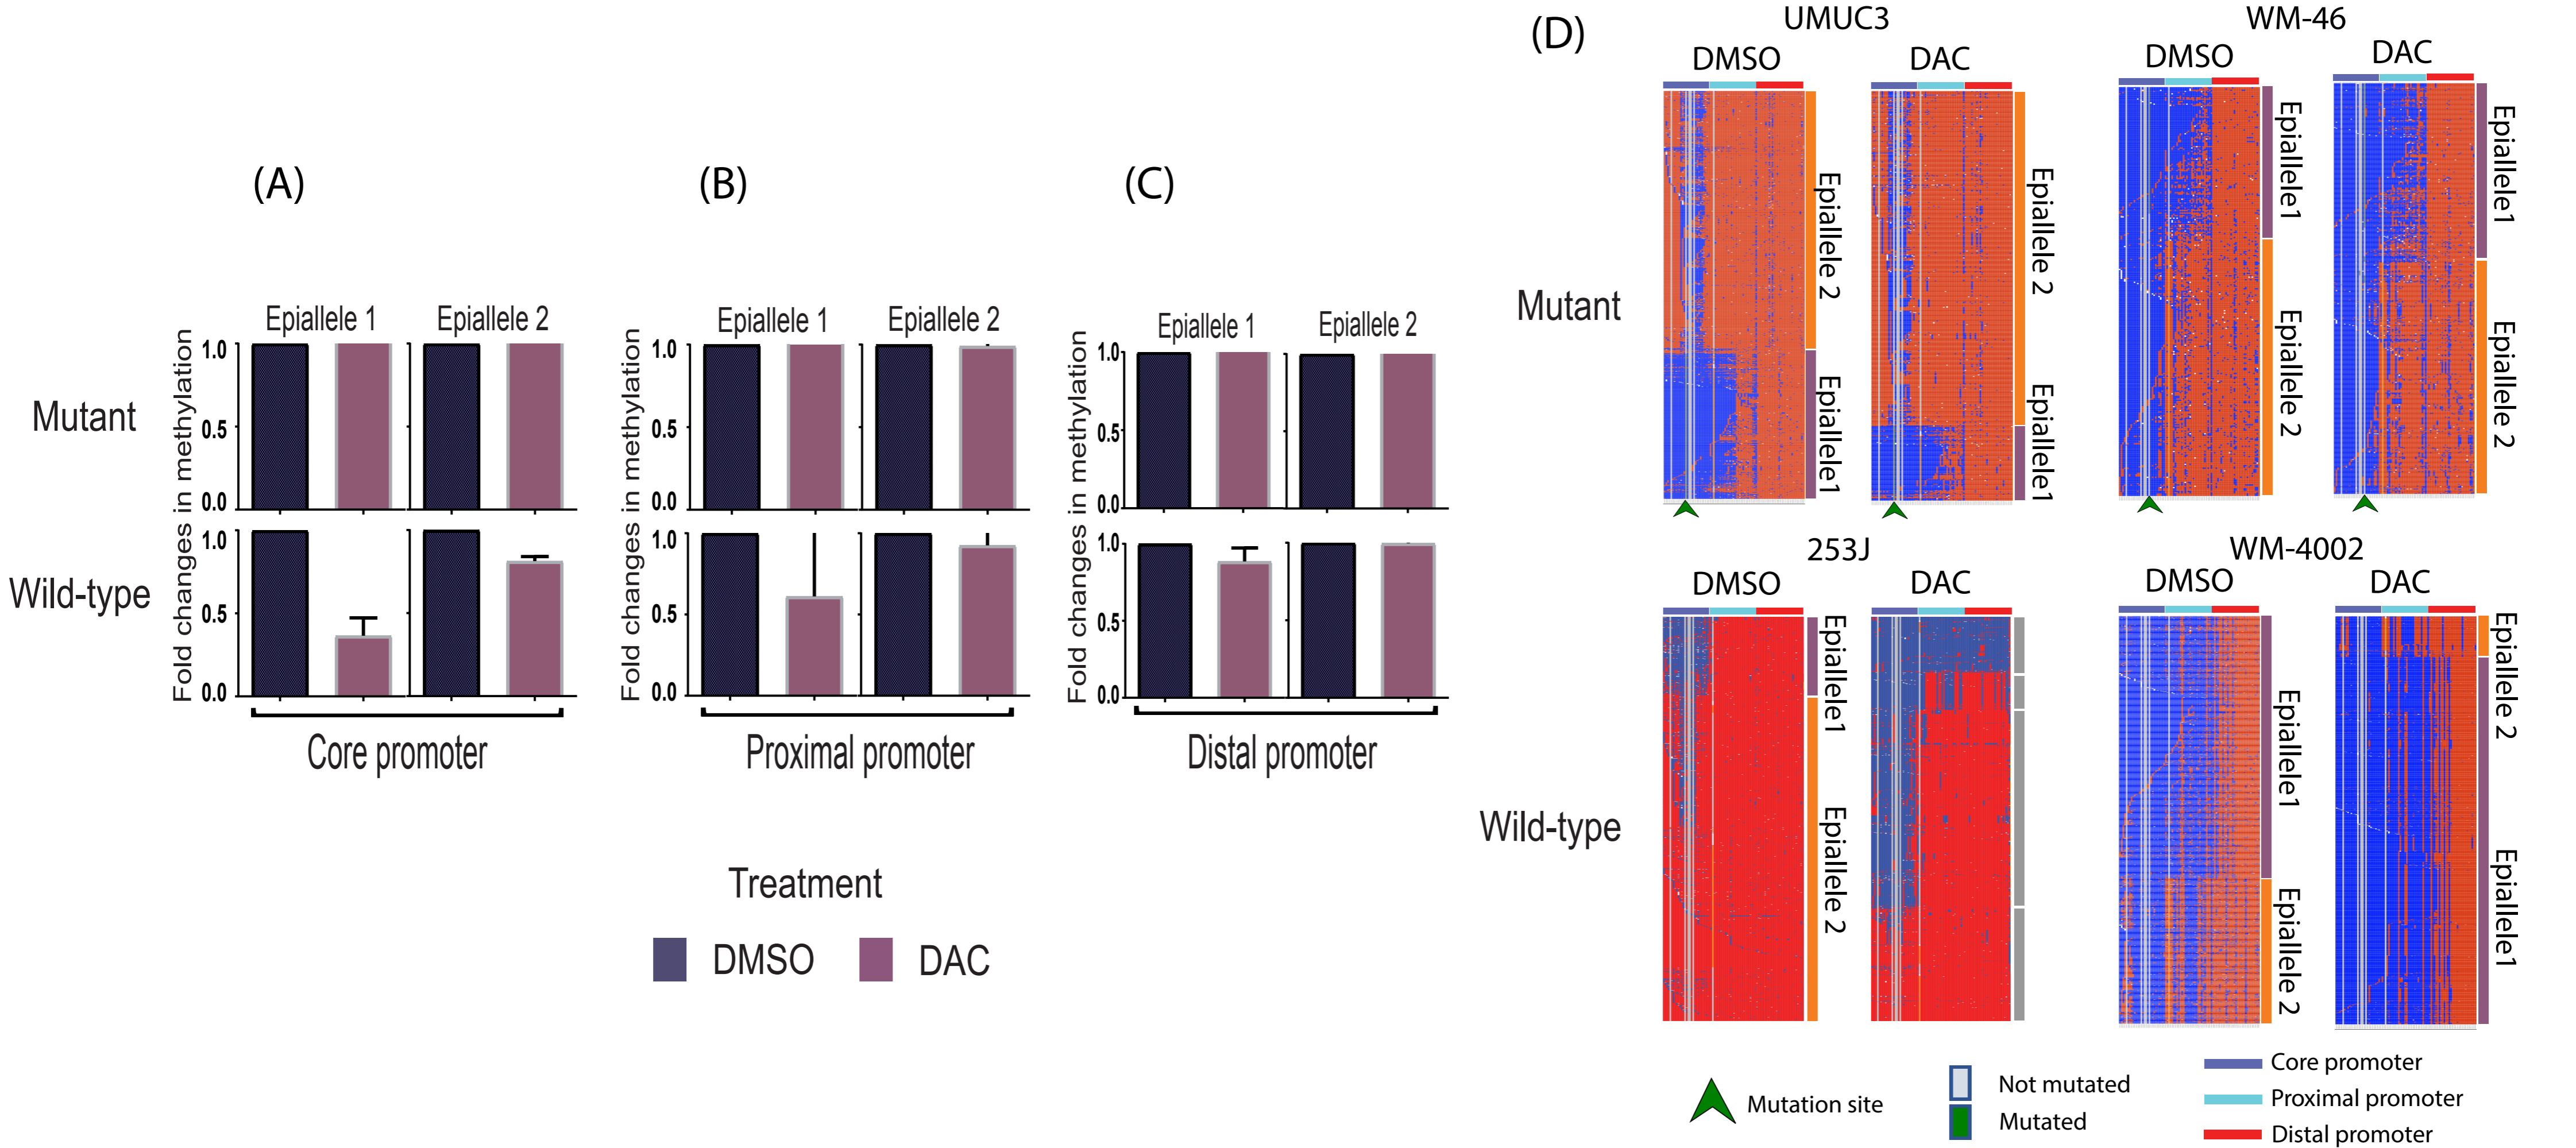

Supplement: s1 [file s1]
